# Supplementary material
Source: PubMed Central journal article supplement (PMC11090616)
Supplement: NIHMS1972371-supplement-SI_Fig_Table.pdf [file NIHMS1972371-supplement-SI_Fig_Table.pdf]

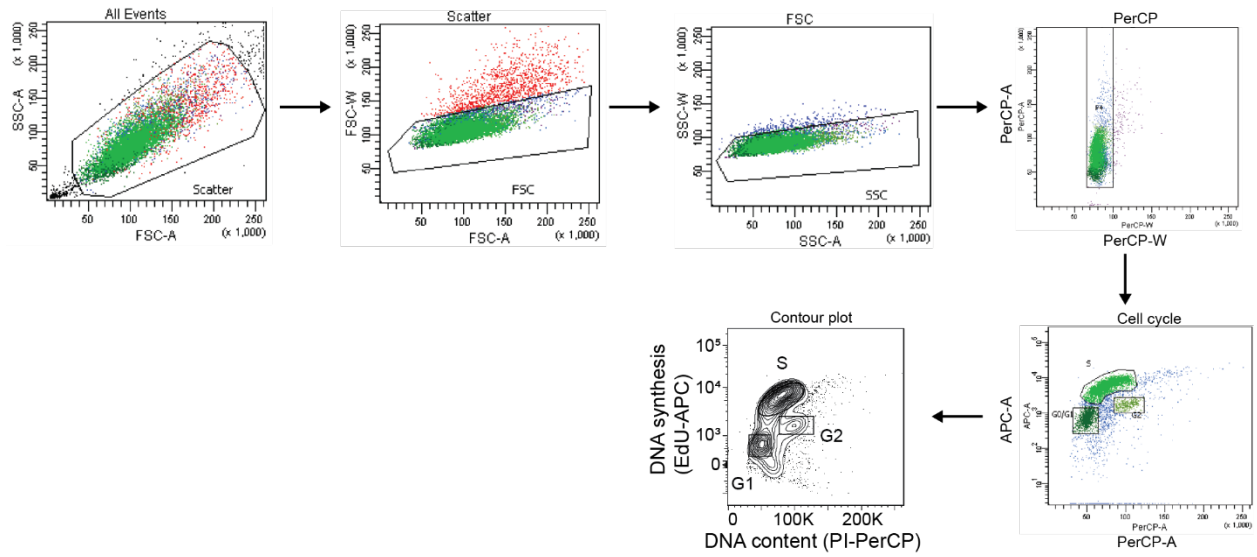

**Supplementary Figure 1.** Flow cytometry gating strategy for cell cycle analysis, corresponding to Extended Data Figure 1b. RBE cells were gated based on SSC-A/FSC-A/FSC-W/SSC-W/PerCP-W/PerCP-A before analyzing cell populations at each cell cycle stage. The scatter plot was then converted to the contour plot for formatting.

**Supplementary Table 13.** Small molecule screening data

| Category          | Parameter                                | Description                                                                                                                                                                                                             |
|-------------------|------------------------------------------|-------------------------------------------------------------------------------------------------------------------------------------------------------------------------------------------------------------------------|
| Assay             | Type of assay                            | CellTiter-Glo Luminescent Cell Viability Assay                                                                                                                                                                          |
|                   | Target                                   | None                                                                                                                                                                                                                    |
|                   | Primary measurement                      | ATP content                                                                                                                                                                                                             |
|                   | Key reagents                             | CellTiter-Glo (Promega) reagent quantifies cellular ATP levels as a proxy for viability                                                                                                                                 |
|                   | Assay protocol                           | Details in Supplementary Table 11                                                                                                                                                                                       |
|                   | Additional comments                      | None                                                                                                                                                                                                                    |
| Library           | Library size                             | 7,988 compounds                                                                                                                                                                                                         |
|                   | Library composition                      | Mechanism Interrogation Plate (MIPE) comprised of 1,912 compounds, the NCATS Pharmacologically Active Chemical Toolbox (NPACT) comprised of 5,099 compounds, and a kinase inhibitor library comprised of 977 compounds. |
|                   | Source                                   | NCATS                                                                                                                                                                                                                   |
|                   | Additional comments                      | None                                                                                                                                                                                                                    |
| Screen            | Format                                   | Quantitative high-throughput screen (qHTS)                                                                                                                                                                              |
|                   | Concentration(s) tested                  | 92.1 $\mu$ M, 18.4 $\mu$ M, 3.68 $\mu$ M, 0.73 $\mu$ M, 0.15 $\mu$ M, 0.03 $\mu$ M and 0.006 $\mu$ M                                                                                                                    |
|                   | Plate controls                           | Positive control (2 mM Bortezomib) and neutral control (DMSO only wells)                                                                                                                                                |
|                   | Reagent/ compound dispensing system      | Reagent: dispenser (Aspect Automation, St. Paul, MN)<br>Compounds: pintool (Kalypsys, San Diego, CA)                                                                                                                    |
|                   | Detection instrument and software        | ViewLux microplate imager (PerkinElmer, Waltham, MA)                                                                                                                                                                    |
|                   | Assay validation/QC                      | QC by S:B ratio, Z'-factor and CV%                                                                                                                                                                                      |
|                   | Correction factors                       | None                                                                                                                                                                                                                    |
|                   | Normalization                            | Data was normalized relative to positive control (2 mM Bortezomib, 0% activity, full inhibition) and DMSO only wells (basal, 100% activity).                                                                            |
|                   | Additional comments                      | Data normalization and curve fitting were performed using in-house informatics tools.                                                                                                                                   |
| Post-HTS analysis | Hit criteria                             | High confidence cytotoxic compounds were defined as those that yielded a curve class of -1.1, -1.2, -2.1, -2.2, a maximum response of >50% and an IC <sub>50</sub> of < 10 $\mu$ M                                      |
|                   | Hit rate                                 | 1.9%                                                                                                                                                                                                                    |
|                   | Additional assay(s)                      | CellTiter-Glo assay for hit confirmation                                                                                                                                                                                |
|                   | Confirmation of hit purity and structure | Hit was resynthesized in-house and the structure was determined by 1H NMR                                                                                                                                               |
|                   | Additional comments                      | None                                                                                                                                                                                                                    |
